## RESEARCH ARTICLE

# A new potassium ion current induced by stimulation of M<sub>2</sub> cholinergic receptors in fish atrial myocytes

 Denis V. Abramochkin<sup>1,2,\*</sup>, Svetlana V. Tapilina<sup>1</sup> and Matti Vornanen<sup>3</sup>
**ABSTRACT**

A novel potassium ion current induced by muscarinic stimulation ( $I_{KACH2}$ ) is characterized in atrial cardiomyocytes of teleost fishes (crucian carp, *Carassius carassius*; rainbow trout, *Oncorhynchus mykiss*) by means of the whole-cell patch-clamp technique. The current is elicited in atrial, but not ventricular, cells by application of carbamylcholine (CCh) in moderate to high concentrations ( $10^{-7}$ – $10^{-4}$  mol l<sup>-1</sup>). It can be distinguished from the classic  $I_{KACH}$ , activated by the  $\beta\gamma$ -subunit of the G<sub>i</sub>-protein, because of its low sensitivity to Ba<sup>2+</sup> ions and distinct current–voltage relationship with a very small inward current component. Ni<sup>2+</sup> ions (5 mmol l<sup>-1</sup>) and KB-R7943 ( $10^{-5}$  mol l<sup>-1</sup>), non-selective blockers of the sodium–calcium exchange current ( $I_{NCX}$ ), strongly reduced and completely abolished, respectively, the  $I_{KACH2}$ . Therefore,  $I_{KACH2}$  was initially regarded as a CCh-induced outward component of the  $I_{NCX}$ . However, the current is not affected by either exclusion of intracellular Na<sup>+</sup> or extracellular Ca<sup>2+</sup>, but is completely abolished by intracellular perfusion with K<sup>+</sup>-free solution. Atropine ( $10^{-6}$  mol l<sup>-1</sup>), a non-selective muscarinic blocker, completely eliminated the  $I_{KACH2}$ . A selective antagonist of M<sub>2</sub> cholinergic receptors, AF-DX 116 ( $2 \times 10^{-7}$  mol l<sup>-1</sup>) and an M<sub>3</sub> antagonist, 4-DAMP ( $10^{-9}$  mol l<sup>-1</sup>), decreased  $I_{KACH2}$  by 84.4% and 16.6%, respectively. Pertussis toxin, which irreversibly inhibits G<sub>i</sub>-protein coupled to M<sub>2</sub> receptors, reduced the current by 95%, when applied into the pipette solution. It is concluded that  $I_{KACH2}$ , induced by stimulation of M<sub>2</sub> cholinergic receptors and subsequent G<sub>i</sub>-protein activation, represents a new molecular target for the cardiac parasympathetic innervation.

**KEY WORDS:** Acetylcholine, Muscarinic receptors, Fish heart, Atrial myocytes, Ionic currents,  $I_{KACH}$ .

**INTRODUCTION**

Cardiac contractility is adjusted to circulatory demands on a beat-to-beat basis by the interaction of sympathetic and parasympathetic nervous systems via  $\beta$ -adrenergic receptors and muscarinic (M<sub>2</sub>) cholinergic receptors, respectively (Hartzell, 1988). Effects of sympathetic activation are rapidly reversed by parasympathetic stimulation, despite the continued sympathetic tone via the ‘accentuated antagonism’ of the autonomic nerves (Levy, 1971). It is widely recognized that the main parasympathetic neurotransmitter, acetylcholine (ACh), induces negative chronotropic and inotropic effects mainly via the activation of the second subtype (M<sub>2</sub>) of muscarinic cholinergic receptors, which prevails in the mammalian

myocardium (Dhein et al., 2001), even though the involvement of M<sub>3</sub> cholinergic receptors in mediation of ACh effects has been recently confirmed (Abramochkin et al., 2012; Wang et al., 2007).

The crucial cardiotropic effects of M<sub>2</sub> cholinergic receptors are mediated by activation of the ACh-gated inwardly rectifying K<sup>+</sup> current ( $I_{KACH}$ ) via G<sub>i</sub> proteins. Binding of ACh to M<sub>2</sub> receptors leads to dissociation of G<sub>i</sub> proteins and subsequent direct activation of K<sub>ACh</sub> channels by their  $\beta\gamma$ -subunits (Hibino et al., 2010).  $I_{KACH}$  belongs to the family of cardiac inward rectifiers ( $I_{Kir}$ ), which includes two other K<sup>+</sup> current systems: the background inward rectifier current ( $I_{K1}$ ) and the ATP-sensitive current. Consistent with its physiological function in maintaining a stable negative resting membrane potential, the  $I_{K1}$  is significant in ventricular myocytes, less prominent in atrial cardiomyocytes and practically absent in the pacemaker cells of the sinoatrial node. Opposite to the  $I_{K1}$ , the density of  $I_{KACH}$  is much higher in supraventricular cardiac tissues than in ventricular myocardium, which appears in electric activity as high sensitivity of atrial and pacemaker action potentials (APs) to muscarinic modulation. Induction of the  $I_{KACH}$  by stimulation of M<sub>2</sub> receptors leads to hyperpolarisation, which is particularly distinct in the pacemaker cells, and AP shortening, which is more pronounced in the atrial myocardium than in the pacemakers (Boyett et al., 1995).

In the present study, we demonstrate the presence of another K<sup>+</sup> current associated with muscarinic stimulation in atrial cardiomyocytes of fish. It can be clearly distinguished from the conventional  $I_{KACH}$  by its low sensitivity to Ba<sup>2+</sup>. The outward component of the novel current ( $I_{KACH2}$ ) has a current–voltage dependence very similar to that of the  $I_{KACH}$ , but in contrast to the  $I_{KACH}$  the inward component of  $I_{KACH2}$  is very small. Activation of this novel carbamylcholine chloride (CCh)-sensitive current seems to be mediated by a pertussis toxin (PTX)-dependent pathway involving M<sub>2</sub> receptors.

**RESULTS****Current induced by CCh in fish atrial myocytes and its ionic nature**

When studying the Na–Ca exchange current ( $I_{NCX}$ ) in fish cardiac myocytes, we noticed that the recorded current was strongly and quickly increased by CCh, a muscarinic agonist. Conditions for  $I_{NCX}$  recording require Cs<sup>+</sup>-based pipette and external solutions (for composition, see Materials and methods) and various ion channel blockers (tetrodotoxin, nifedipine, E-4032 and BaCl<sub>2</sub> for sodium, calcium, delayed rectifier and inward rectifier currents, respectively) applied into the external saline solution. Because of the experimental setting for  $I_{NCX}$  recording, it was initially thought that activation of the current represented parasympathetic modulation of the  $I_{NCX}$ . Indeed, both atrial and ventricular myocytes of crucian carp and rainbow trout hearts demonstrate a definite background  $I_{NCX}$  before CCh addition (Fig. 1). During the experimental protocol, both inward and outward components of the  $I_{NCX}$  always increased during the first 2–3 min after gaining access to the whole-cell

<sup>1</sup>Department of Human and Animal Physiology, Moscow State University, Leninskiye Gory, 1, 12, Moscow 119991, Russia. <sup>2</sup>Department of Fundamental and Applied Physiology, Russian National Research Medical University, Moscow 117997, Russia. <sup>3</sup>Department of Biology, University of Eastern Finland, FI-80101 Joensuu, Finland.

\*Author for correspondence (abram340@mail.ru)

### List of symbols and abbreviations

|            |                                                      |
|------------|------------------------------------------------------|
| ACh        | acetylcholine                                        |
| AP         | action potential                                     |
| CCh        | carbamylcholine chloride                             |
| $I_{K1}$   | background inward rectifier $K^+$ current            |
| $I_{KACH}$ | acetylcholine-activated inward rectifier current     |
| $I_{NCX}$  | NCX current                                          |
| M-receptor | muscarinic receptor                                  |
| NCX        | sodium–calcium exchanger                             |
| PTX        | pertussis toxin                                      |
| $SK_{Ca}$  | small conductance $Ca^{2+}$ -activated $K^+$ channel |

recording, and then remained relatively stable for up to 30 min or more. This background current could be completely blocked by an organic blocker KB-R7943 ( $10^{-5}$  mol l $^{-1}$ ) or suppressed by 60–80% with 5 mmol l $^{-1}$  Ni $^{2+}$  (data not shown).

CCh at concentrations of  $10^{-6}$ – $10^{-4}$  mol l $^{-1}$  induced a marked increase in the recorded current in atrial myocytes of both crucian carp and rainbow trout (Fig. 1). We define the CCh-induced current as the difference between the current in the presence of CCh and the current recorded just before CCh application (see current–voltage curves in Fig. 1C,D). In contrast to the basal KB-R7943-sensitive current, which had both inward and outward current components, the CCh-induced current was exclusively in the outward direction. CCh-induced current had the same shape in atrial myocytes of both fish species (Fig. 1C,D). However, the density of the current produced by  $10^{-4}$  mol l $^{-1}$  CCh was ~42% larger in crucian carp ( $10.48 \pm 1.89$  pA pF $^{-1}$ ) than in rainbow trout ( $7.39 \pm 1.62$  pA pF $^{-1}$ ) myocytes ( $P < 0.05$ , Mann–Whitney test). In ventricular myocytes of both species, CCh up to the concentration of  $10^{-4}$  mol l $^{-1}$  failed to produce any distinguishable effects. This is not surprising in light of the well-known insensitivity of fish ventricular myocardium to muscarinic agonists (Vornanen and Tuomennoro, 1999).

KB-R7943 ( $10^{-5}$  mol l $^{-1}$ ), a non-selective blocker of NCX, abolished both the CCh-sensitive and the background current ( $I_{NCX}$ ), leaving only a tiny leakage current (Fig. 1A). A concentration of 5 mmol l $^{-1}$  Ni $^{2+}$ , a non-specific inorganic blocker of the NCX, strongly reduced or abolished (70–100%) the overall CCh-sensitive and background current (Fig. 1B). However, Ni $^{2+}$  turned out to be toxic to fish cardiac myocytes (most of the studied cells died 20–30 s after the start of Ni $^{2+}$  application), which prevented its routine use as an NCX blocker. The noticed sensitivity of the CCh-induced current to standard blockers of  $I_{NCX}$  suggested that the recorded current represented parasympathetic stimulation of the outward  $I_{NCX}$ . Ion substitution experiments involving exclusion of Na $^+$  from the pipette solution or omission of Ca $^{2+}$  from the extracellular saline solution did not, however, support this assumption. In the first series of experiments, 5 mmol l $^{-1}$  Na $_2$ ATP in the pipette solution was substituted by 5 mmol l $^{-1}$  MgATP. The CCh-induced current was still present and not less than in the controls (Fig. 2A,B). In the second series of experiments, we used a Ca $^{2+}$ -free external solution supplemented with 5 mmol l $^{-1}$  EGTA to ensure practical absence of intracellular free Ca $^{2+}$ . The application of this solution led to an expected decrease in the outward component of the background  $I_{NCX}$ , but subsequent addition of  $10^{-5}$  mol l $^{-1}$  CCh produced a large outward current (Fig. 2A,C). Substitution of Na $^+$  with Li $^+$  in the composition of the Ca $^{2+}$ -free Tyrode, a well-known way to suppress  $I_{NCX}$  (Sanders et al., 2006), also failed to affect the CCh-induced current, although the basal  $I_{NCX}$  was reduced in a manner similar to the experiments with normal Ca $^{2+}$ -free Tyrode (Fig. 2A,D). Therefore, the CCh-induced current is evidently not a component of the  $I_{NCX}$ .

In all experiments described above we used Cs $^+$ -based pipette solution 1 (for composition, see Materials and methods). However, this solution contained 20 mmol l $^{-1}$  BAPTA K $^+$  salt for intracellular Ca $^{2+}$  buffering. Therefore, in the next series of experiments we used a modified pipette solution 1, where K $_4$ BAPTA was substituted with

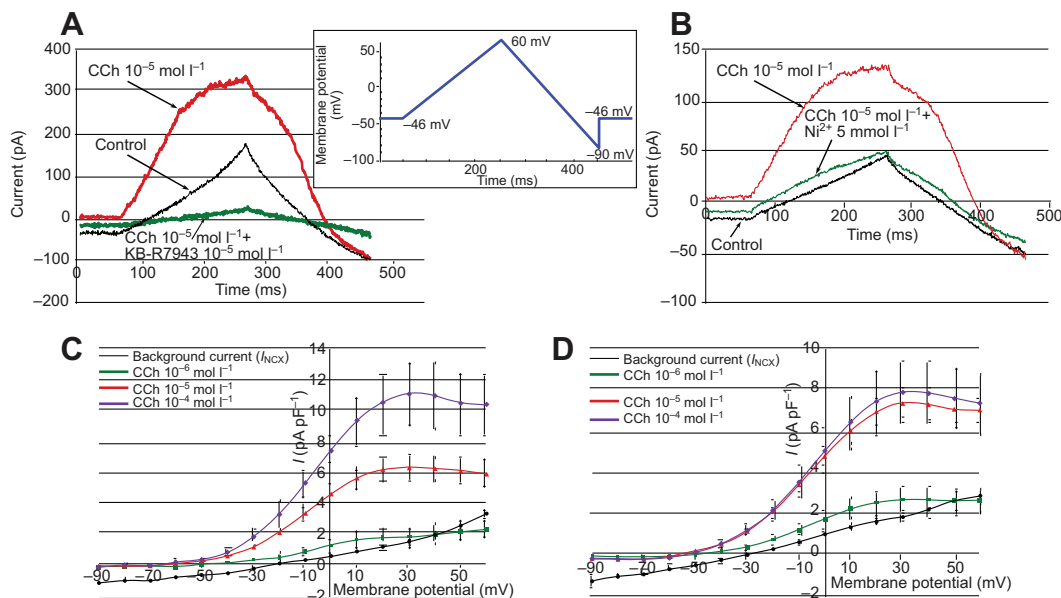

**Fig. 1. Basal current and carbamylcholine (CCh)-induced current in fish atrial myocytes.** (A,B) Original current–voltage recordings from two representative experiments. Black line shows the background sodium–calcium exchanger current ( $I_{NCX}$  or Control) after 5 min access to the whole-cell configuration in the absence of CCh; red and green lines indicate the current in the presence of  $10^{-5}$  mol l $^{-1}$  CCh and  $10^{-5}$  mol l $^{-1}$  CCh +  $10^{-5}$  mol l $^{-1}$  KB-R7943 (A) or  $10^{-5}$  mol l $^{-1}$  CCh + 5 mmol l $^{-1}$  Ni $^{2+}$  (B), respectively. The inset shows the voltage ramp used to elicit the current. Experiments were conducted using the external Cs $^+$ -based Tyrode solution and pipette solution 1 (for composition, see Materials and methods). (C,D) Mean current–voltage curves of the background sodium–calcium exchanger current ( $I_{NCX}$ ) (C,  $n=25$ ; D,  $n=10$ ) and CCh-induced current recorded in the presence of  $10^{-6}$  mol l $^{-1}$  (C,  $n=25$ ; D,  $n=14$ ),  $10^{-5}$  mol l $^{-1}$  (C,  $n=40$ ; D,  $n=16$ ) and  $10^{-4}$  mol l $^{-1}$  (C,  $n=9$ ; D,  $n=16$ ) CCh in atrial cardiomyocytes from crucian carp (C) and rainbow trout (D). Current–voltage curves of the CCh-induced current were obtained after subtraction of the basal  $I_{NCX}$  current. Cells were obtained from five crucian carp and four rainbow trout.

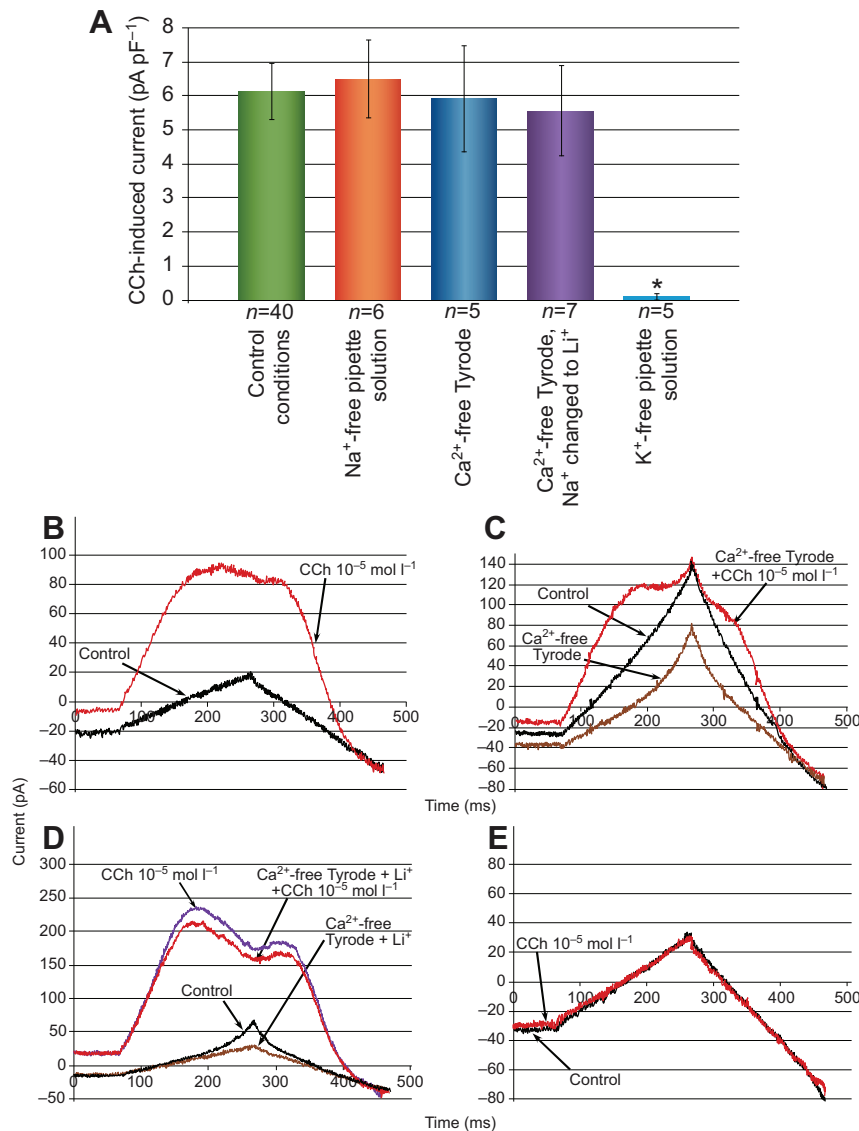

**Fig. 2. Dependence of the CCh-induced current on intracellular  $\text{Na}^+$  and  $\text{K}^+$  and extracellular  $\text{Ca}^{2+}$  in crucian carp atrial myocytes.** (A) Comparison of the CCh-induced current density at +20 mV in different experimental conditions. The results are means  $\pm$  s.e.m. of five to 40 myocytes as indicated above the bars. An asterisk indicates a statistically significant difference ( $P < 0.05$ , Mann-Whitney test) between the  $\text{K}^+$ -free conditions and all other experimental conditions. (B–E) Original traces of the basal  $I_{\text{NCX}}$  and the total current after CCh application recorded in different experimental conditions. (B)  $\text{Na}^+$ -free pipette solution 1 was used ( $\text{Na}_2\text{ATP}$  was substituted with  $\text{MgATP}$ ). (C,D) Normal pipette solution 1 was used, but modified external  $\text{Cs}^+$ -based Tyrode solutions were applied during the recordings. (E) Pipette solution 1 with  $\text{K}_4\text{BAPTA}$  replaced with EGTA. In all experiments, the same voltage ramp pulse as shown in the inset in Fig. 1 was applied to elicit the current.

EGTA (free acid). Under these conditions,  $10^{-5} \text{ mol l}^{-1}$  CCh failed to induce any outward or inward current (Fig. 2A,E), clearly indicating that the studied current was carried by  $\text{K}^+$  ions. Thus, although the CCh-induced current can be elicited using an NCX protocol (voltage ramp) and is blocked by  $\text{Ni}^{2+}$  and KB-R7943, it is independent of the NCX and is carried by  $\text{K}^+$ .

#### Effect of CCh is mainly mediated via $\text{M}_2$ muscarinic receptors

Using pharmacological blockers, we tried to find out which subtype(s) of cholinergic receptors might mediate the activation of the CCh-induced current. In atrial myocytes from both species, atropine ( $10^{-6} \text{ mol l}^{-1}$ ), which blocks muscarinic cholinergic receptors without subtype discrimination, completely abolished the outward current induced by  $10^{-5} \text{ mol l}^{-1}$  CCh (Fig. 3A,B). Atropine blocked only the CCh-induced current, without effect on the basal  $I_{\text{NCX}}$ . These findings strongly suggest that the induction of the outward current by CCh is mediated by muscarinic cholinergic receptors.

The major role of  $\text{M}_2$  muscarinic receptors in the mediation of cardiac cholinergic response is widely recognized. However, the presence of physiologically relevant  $\text{M}_3$  cholinergic receptors was confirmed during the last decade for mammalian myocardium

(Hellgren et al., 2000; Kitazawa et al., 2009), and therefore cannot be neglected as a possible signaling pathway in fish cardiac myocytes. To this end, we have investigated effects of the selective  $\text{M}_3$  blocker 4-DAMP ( $10^{-9} \text{ mol l}^{-1}$ ) and selective  $\text{M}_2$  antagonist AF-DX 116 ( $2 \times 10^{-7} \text{ mol l}^{-1}$ ) on the CCh ( $10^{-5} \text{ mol l}^{-1}$ )-induced current. The selected agonist concentrations have been shown in a previous patch-clamp study (Wang et al., 1999) to exert subtype-specific effects on muscarinic signaling, while higher concentrations may lead to non-selective binding of the blockers.

Application of AF-DX 116 suppressed the CCh-induced current by 84.3% (Fig. 3A,C). In contrast to the marked blocking effect of AF-DX 116, 4-DAMP produced only a slight reduction of the current by 16.6%, although this decrease was significant ( $P < 0.05$ ; Fig. 3A,D). These results suggest a predominant role of  $\text{M}_2$  receptors in the mediation of the CCh effect. To confirm this assumption, we conducted a series of experiments with PTX.

#### Inhibition of the CCh-induced current by PTX

PTX is widely used as a selective inhibitor of  $\text{G}_i$ -protein-mediated signaling pathways. It irreversibly blocks the activity of  $\alpha_i$ -subunit by ADP-ribosylation, which prevents the  $\alpha_i$ -subunit from interacting with the receptor molecule. The routine way of PTX application is

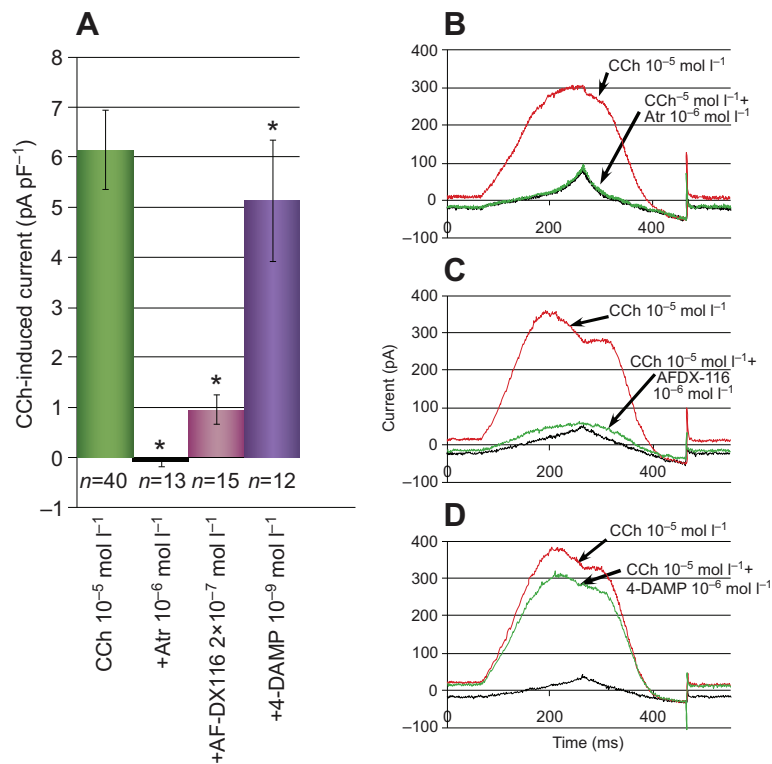

**Fig. 3. Effect of cholinergic antagonists on the CCh-induced current in crucian carp atrial myocytes.** The current was first elicited with  $10^{-5}$  mol l $^{-1}$  CCh and then different blockers were applied in the continuous presence of CCh. (A) Mean ( $\pm$ s.e.m.) effects of atropine, AF-DX116 and 4-DAMP at +20 mV. An asterisk indicates a statistically significant difference ( $P < 0.05$ , Mann–Whitney test) from the control (CCh alone). Original traces from representative experiments are shown in B–D. The same voltage ramp pulse as shown at the inset in Fig. 1 was used to elicit the current. Experiments were conducted using the external Cs $^{+}$ -based Tyrode solution and pipette solution 1.

incubation of isolated myocytes in a medium containing the toxin. Several pilot experiments using the protocols of PTX application to mammalian and frog cardiac myocytes (2–4 h of incubation at room temperature in a medium containing up to  $6 \mu\text{g ml}^{-1}$  PTX) failed to induce any decrease of the CCh-induced current in fish atrial myocytes. This negative result could be due to the absence of a membrane receptor for PTX or any other downstream step responsible for endocytosis of the toxin and its intracellular activation in fish cardiomyocytes. Therefore, we decided to add PTX directly to pipette solution 1 ( $1 \mu\text{g ml}^{-1}$ ) before patching and wait for diffusion of PTX inside the cell. A similar method of PTX administration was previously successfully used in outer cells of guinea pig cochlea (Kakehata et al., 1993), although to our knowledge we have applied it in cardiomyocytes for the first time. To examine PTX action, we recorded the effect of  $10^{-5}$  mol l $^{-1}$  CCh on membrane current every 10 min during the 30 min internal perfusion of the cell with pipette solution containing PTX. Similar long-term control recordings were performed using a normal PTX-free pipette solution.

After the first minute of recording with pipette solution containing PTX, the cells demonstrated a normal strong increase of the outward current ( $6.03 \pm 1.95$  pA pF $^{-1}$ ) in response to  $10^{-5}$  mol l $^{-1}$  CCh (Fig. 4). However, later on, the CCh-induced current started to gradually fade, so that after 30 min of internal perfusion it was only  $0.3 \pm 0.33$  pA pF $^{-1}$  ( $P < 0.05$ ), i.e. 5% of the initial value. In control experiments without PTX in the pipette solution, the amplitude of CCh-induced current was not significantly changed during the 30 min internal perfusion ( $5.54 \pm 0.81$  versus  $6.2 \pm 1.83$  pA pF $^{-1}$ , respectively;  $P > 0.05$ ). Thus, PTX applied to the pipette solution effectively inhibits the response to CCh. Taken together with the data obtained using subtype-selective muscarinic blockers, these findings strongly suggest a crucial role of M $_2$  cholinergic receptors in mediation of the outward current induction by CCh.

Thus, the CCh-induced current is carried by K $^{+}$  ions and can be activated by stimulation of the cardiac muscarinic receptors. Because of the similarity of the CCh-induced current to the  $I_{K_{\text{ACh}}}$ ,

we decided to refer to it as  $I_{K_{\text{ACh}2}}$  and tested its possible identity with the classic  $I_{K_{\text{ACh}}}$ .

#### Distinguishing $I_{K_{\text{ACh}2}}$ from other K $^{+}$ currents

We attempted to determine whether  $I_{K_{\text{ACh}2}}$  is a novel and separate current entity or just a CCh-sensitive component of the  $I_{K_{\text{ACh}}}$  or other known cardiac K $^{+}$  currents. The presence of Cs $^{+}$  in both external and intracellular solution and the addition of E-4031 to Cs $^{+}$ -based Tyrode allowed to exclude the involvement of the delayed rectifier K $^{+}$  currents, which also have almost linear current–voltage dependence and are not coupled to muscarinic receptors.

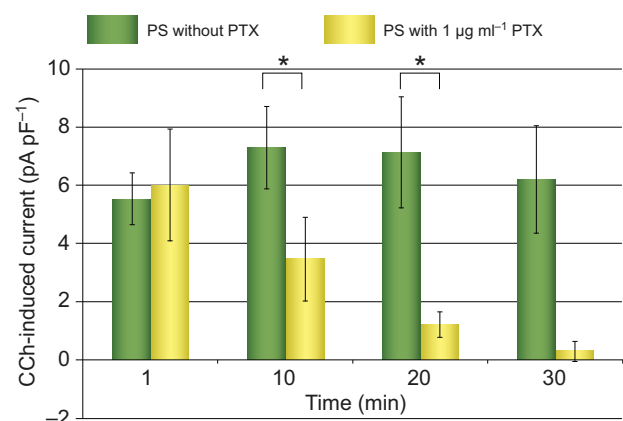

**Fig. 4. Effect of intracellular perfusion with PTX on the density of CCh-induced current in atrial myocytes of the crucian carp.** PTX was included in pipette solution (PS) 1 and the myocytes were perfused for 30 min with continuous recording of the current. An asterisk indicates a statistically significant difference ( $P < 0.05$ , Mann–Whitney test) between two columns. The same voltage ramp pulse as shown at the inset in Fig. 1 was used to elicit the current. Experiments were conducted using the external Cs $^{+}$ -based Tyrode solution. The number of experiments ( $n$ ) was 8 and 6 cells for control and PTX experiments, respectively.



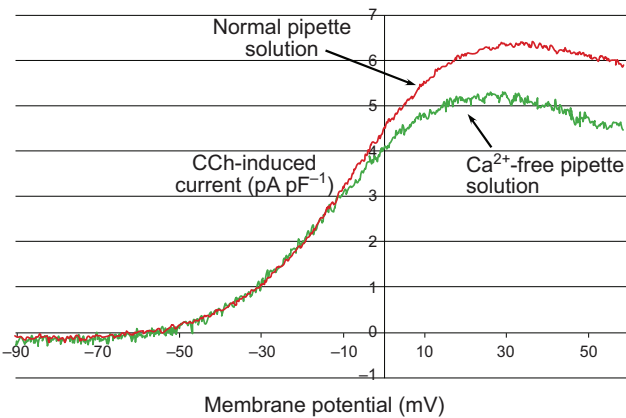

**Fig. 5. Representative current–voltage curves of  $I_{K_{ACh2}}$  recorded in crucian carp atrial myocytes with the use of the standard pipette solution 1 and the same solution without  $CaCl_2$ .** The intracellular calcium concentration was  $105 \text{ nmol l}^{-1}$  in control conditions and less than  $1 \text{ nmol l}^{-1}$  when using  $Ca^{2+}$ -free pipette solution. The same voltage ramp pulse as shown at the inset in Fig. 1 was used to elicit the current. Experiments were conducted using the external  $Cs^+$ -based Tyrode solution.

In our experiments, we did not specifically block the putative  $Ca^{2+}$ -dependent  $K^+$  current, which is carried by the small conductance  $Ca^{2+}$ -activated  $K^+$  channels ( $SK_{Ca}$ ) in mammalian atrial and ventricular myocytes (Xu et al., 2003). However, in murine and human cells, this current has a prominent inward component at the potentials below potassium equilibrium potential, while the outward current is substantial only at potentials more positive than  $-40 \text{ mV}$ . Although  $Ca^{2+}$ -dependent  $K^+$  current has never been registered in fish cardiomyocytes, in mammalian cells the current density strongly depends on intracellular  $Ca^{2+}$  content and is negligible at  $10^{-8} \text{ mol l}^{-1}$  intracellular  $Ca^{2+}$  (Xu et al., 2003). Experiments with  $Ca^{2+}$ -free pipette solution (BAPTA substituted with EGTA, no  $CaCl_2$ , free  $[Ca^{2+}]_{in} < 10^{-9} \text{ mol l}^{-1}$ ) were conducted in crucian carp atrial cells to prevent  $SK_{Ca}$  from contributing to the CCh-induced current. The  $I_{K_{ACh2}}$  at  $+20 \text{ mV}$  was significantly less than in the control conditions ( $5.22 \pm 1.11$  versus  $6.16 \pm 0.83 \text{ pA pF}^{-1}$ , respectively;  $P > 0.05$ ; Fig. 5), but still far from inhibited. Obviously,  $I_{K_{ACh2}}$  is different from  $SK_{Ca}$ , which would be completely blocked in the practical absence of intracellular free  $Ca^{2+}$ .

Finally, there was a possibility of incomplete inhibition of inward rectifiers ( $I_{Kir}$ ) by  $10^{-4} \text{ mol l}^{-1} BaCl_2$ . Then  $I_{K_{ACh2}}$  could be just a part of the classic  $I_{K_{ACh}}$ . To test this assumption, we recorded  $I_{Kir}$  in the  $K^+$ -based Tyrode solution without  $BaCl_2$ . The density of the basal  $I_{K1}$  was very low, like it usually is in fish atrial cardiomyocytes (Fig. 6A). Application of  $10^{-5} \text{ mol l}^{-1}$  CCh produced a large increase in the inwardly rectifying current and, especially, the outward  $I_{Kir}$ . The density of recorded current was  $4.87 \pm 0.42 \text{ pA pF}^{-1}$  at  $+20 \text{ mV}$  and  $-19.23 \pm 0.51 \text{ pA pF}^{-1}$  at  $-120 \text{ mV}$ . Subsequent addition of  $10^{-4} \text{ mol l}^{-1} BaCl_2$  blocked the inward current by 97% ( $-0.58 \pm 0.06 \text{ pA pF}^{-1}$  at  $-120 \text{ mV}$ ), while the outward current persisted ( $1.45 \pm 0.69 \text{ pA pF}^{-1}$  at  $+20 \text{ mV}$ ). Increase in  $Ba^{2+}$  concentration up to  $3 \times 10^{-4} \text{ mol l}^{-1}$  did not lead to further decrease of the outward current ( $1.45 \pm 0.69 \text{ pA pF}^{-1}$  at  $+20 \text{ mV}$ ). On the contrary, addition of  $10^{-5} \text{ mol l}^{-1}$  KB-R7943 practically abolished the outward current ( $0.27 \pm 0.07 \text{ pA pF}^{-1}$  at  $+20 \text{ mV}$ ). It seems that  $10^{-4} \text{ mol l}^{-1} Ba^{2+}$  completely blocks the inward rectifiers (both  $I_{K1}$  and  $I_{K_{ACh}}$ ), while  $I_{K_{ACh2}}$  resists  $Ba^{2+}$ , but not KB-R7943.

The current–voltage curves for  $I_{K_{ACh}}$  and  $I_{K_{ACh2}}$  were obtained from these data (Fig. 6B). It is clear that the former current is a

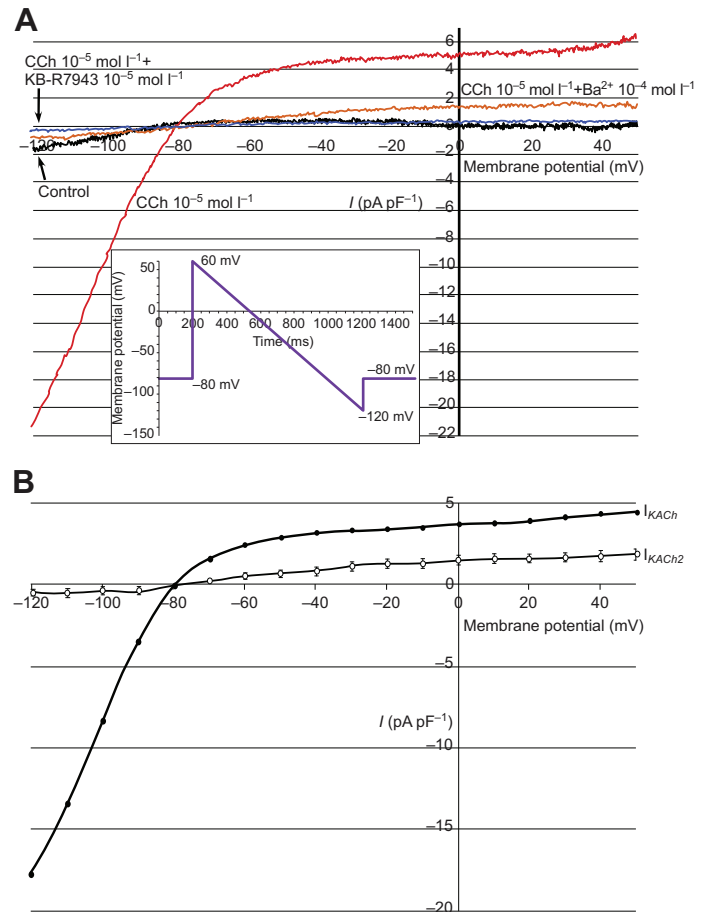

**Fig. 6. Comparison of  $I_{K_{ACh2}}$  with the inward rectifiers in crucian carp atrial myocytes.** (A) Original current–voltage curves of basal  $I_{Kir}$  ( $I_{K1}$ ), total current after CCh application ( $I_{K1} + I_{K_{ACh}} + I_{K_{ACh2}}$ ), the current recorded in the presence of CCh and  $Ba^{2+}$  ( $I_{K_{ACh2}}$ ) and the leakage current obtained after addition of KB-R7943. The inset shows the voltage ramp pulse, which was used to elicit the current. Experiments were conducted using the external  $K^+$ -based Tyrode solution and pipette solution 2 (for composition, see Materials and methods). (B) Averaged current–voltage curves ( $n=11$ , 3 fish) of  $I_{K_{ACh}}$  and  $I_{K_{ACh2}}$ . The first curve was obtained by subtraction of basal  $I_{K1} + I_{K_{ACh2}}$  from the total current recorded under CCh.

typical inward rectifier, very large at potentials below the  $E_K$ , while the latter has a tiny inward but a significant outward component. Thus, two currents not only differ in sensitivity to  $BaCl_2$ , but demonstrate principally different current–voltage relationships.

## DISCUSSION

Muscarinic receptor stimulation plays a central role in the parasympathetic control of cardiac function by modulating heart rate (chronotropic effect), contractility (inotropic effect) and conduction velocity (dromotropic effect) (Brodde and Michel, 1999). These effects are particularly strong in pacemaker and atrial tissues. The  $M_2$  muscarinic receptors prevail in the mammalian myocardium, although some  $M_3$  receptors are also present and physiologically active (Pönicke et al., 2003; Wang et al., 2007). The even-numbered muscarinic receptors, including  $M_2$ , are coupled to  $G_i$  proteins and act via inhibition of adenylate cyclase and a subsequent decrease in cellular cAMP content (Dhein et al., 2001). However,  $M_2$  and  $M_3$  receptors can activate different effectors without the second messenger systems. The channels responsible for the inward rectifier  $I_{K_{ACh}}$  are directly stimulated by  $\beta\gamma$ -subunits of the  $G_i$  protein, while joint

activity of  $\beta\gamma$ - and  $\alpha_q$ -subunits is believed to be involved in the stimulation of the delayed rectifier type  $K^+$  current,  $I_{KM3}$  (Wang et al., 1999). The molecular basis of the  $I_{KM3}$  current is still unresolved, but it was recently proposed to be carried by the same channels as the  $I_{KACH}$  (Navarro-Polanco et al., 2013). The delayed rectifier-like properties of the  $I_{KM3}$  could be explained by the increasing affinity of muscarinic receptors to their agonists at positive membrane potentials.

In the present study, we describe a novel  $K^+$  current, induced by muscarinic stimulation, with a distinct current–voltage relationship and pharmacological properties from the known ACh-activated currents,  $I_{KACH}$  and  $I_{KM3}$ . Clear dependence of the current on intracellular and extracellular  $K^+$  concentration and reversal of the current close to the Nernst potential of  $K^+$  ions indicate that the current is carried by  $K^+$  ions. Furthermore, the current is independent from intracellular  $Na^+$  and external  $Ca^{2+}$ . Unlike the cardiac inward rectifiers, the new current cannot be blocked by  $10^{-4}$  mol  $l^{-1}$   $Ba^{2+}$ , which, unlike mammalian cells, is sufficient to abolish both  $I_{K1}$  and  $I_{KACH}$  in crucian carp myocytes (Hassinen et al., 2008). Different from  $I_{KACH}$  and  $I_{K1}$ , it is mainly an outward current with only a tiny inward component. Because of its inwardly rectifying properties at positive voltages and its activation by the intracellular signaling pathway of the  $M_2$  receptors (similar to the  $I_{KACH}$ ), we refer to it as  $I_{KACH2}$ .

Experiments using the subtype-selective muscarinic antagonists and PTX strongly suggest a dominant role of  $M_2$  cholinergic receptors in CCh activation of  $I_{KACH2}$ , a property shared with the  $I_{KACH}$ . AF-DX 116, which at the concentration of  $2 \times 10^{-7}$  mol  $l^{-1}$  is considered to be relatively specific against  $M_2$  cholinergic receptors (Doods et al., 1987; Giachetti et al., 1986), almost completely abolished the  $I_{KACH2}$ . In contrast, an  $M_3$  cholinergic receptor blocker 4-DAMP (Doods et al., 1987), had only a weak inhibitory effect on the CCh-induced current.  $M_2$  cholinergic receptors are coupled to the  $G_i$  proteins and convey their physiological effects via the  $\alpha_i$ -subunit by decreasing cellular cAMP content or via direct coupling of the  $\beta\gamma$ -subunit to their target (channels of inward rectifier  $I_{KACH}$ ) (Brodde and Michel, 1999). Our experiments on CCh were conducted in the absence of  $\beta$ -adrenergic stimulation, i.e. without activation of the cAMP-dependent pathway. Therefore, it could be argued that the  $\alpha_i$ -subunit of the G protein and cAMP might not be involved in  $I_{KACH2}$  induction. It is, however, possible that there is a basal activation of adenylate cyclase in the absence of  $\beta$ -adrenergic stimulation, which is antagonized by a CCh-dependent mechanism. Then the increase in cAMP intracellular content caused by noradrenaline or other adenylate cyclase-stimulating compounds should suppress the  $I_{KACH2}$ . So, further research should shed light on the mechanism of  $I_{KACH2}$  activation.

The present study did not try to clarify the molecular basis of the  $I_{KACH2}$ . However, the  $M_2$ -dependent activation pathway and the inwardly rectifying properties of the current strongly suggest that it is closely related to the  $I_{KACH}$ , which in the mammalian heart is carried by Kir3.1 and Kir3.4 channels (Hibino et al., 2010). The molecular basis of ACh-activated inward rectifiers of the fish heart is not yet known, but because of the whole genome duplication in the teleost fishes (Jaillon et al., 2004), the diversity of this current system may be greater in fishes than mammals. For example, the rapid component of the cardiac delayed rectifier current is represented by at least two different ERG channels in the zebrafish heart (Langheinrich et al., 2003; Milan et al., 2003). Molecular cloning of the fish Kir3 channels and their expression in heterologous system is needed to resolve this issue.

Considering the biophysical similarities of  $I_{KACH2}$  and  $I_{KACH}$ , the physiological role of the  $I_{KACH2}$  is assumed to be comparable to that

of the  $I_{KACH}$ , i.e. shortening of atrial action potential duration with consequent reduction of atrial contraction. However, activation of the  $I_{KACH2}$  requires relatively high (micromolar) agonist concentrations and therefore it is likely to appear only at a strong parasympathetic tone. In contrast to mammals, in fish and amphibians, strong cholinergic stimulation not only reduces AP duration, but gradually decreases AP amplitude in atrial myocardium until the full cessation of electrical activity (Abramochkin et al., 2010). This effect is putatively attributed to induction of a strong outward  $K^+$  current, which overwhelms all inward currents and makes the depolarization impossible. The described  $I_{KACH2}$  may be involved in mediation of this cholinergic effect. Further research, including distribution of Kir3 channels in supraventricular tissues of the fish heart, could reveal possible physiological implications of this novel  $K^+$  current.

## Conclusions

In fish atrial cardiomyocytes, stimulation of the  $M_2$ -mediated second messenger pathway leads to induction of a novel type of  $K^+$  current, the  $I_{KACH2}$ . Different from the  $I_{KACH}$ , this current has a very small inward component and is relatively insensitive to  $Ba^{2+}$  blocking. Together with  $I_{KACH}$ ,  $I_{KACH2}$  may provide shortening of APs in fish atrial myocardium and particularly under a strong cholinergic influence. The similarity of results obtained from crucian carp (family Cyprinidae) and rainbow trout (family Salmonidae) atrial myocytes suggests that the described CCh-dependent activation of  $I_{KACH2}$  might be a common mechanism for different fish groups, and raises the question of whether this mechanism is also relevant for other vertebrates.

## MATERIALS AND METHODS

### Animals

Experiments were conducted on atrial myocytes of two fish species, crucian carp (*Carassius carassius* L.,  $n=31$ ) and rainbow trout (*Oncorhynchus mykiss* W.,  $n=7$ ). Fish were held separately in 500 l stainless steel aquaria with continuous flow of aerated (11 mg  $O_2$   $l^{-1}$ ) groundwater at constant temperature of either 18°C (crucian carp) or 14°C (rainbow trout) and under a 12 h:12 h light:dark photoperiod. During the laboratory maintenance (>4 weeks), the fish were fed aquarium fish food five times a week. The investigation conforms with the Guide for the Care and Use of Laboratory Animals published by the US National Institutes of Health (NIH Publication no. 85–23, revised 1996) and the experimental protocols were approved by the Animal Experiment Board in Finland (permission no. STH252A).

### Isolated myocyte preparation

Fish were stunned with a blow to the head, the spine was cut immediately behind the head and the heart was rapidly excised. Atrial myocytes were isolated by retrograde perfusion of the heart with proteolytic enzymes (collagenase type 1A, 0.75 mg  $ml^{-1}$ ; trypsin type IX, 0.5 mg  $ml^{-1}$ ; fatty-acid-free BSA, 0.75 mg  $ml^{-1}$ ) as described previously in detail (Vornanen, 1997). Isolated cells were stored for up to 8 h at 5°C in low- $Na^+$  solution containing (in mmol  $l^{-1}$ ): NaCl 100, KCl 10,  $KH_2PO_4 \cdot 2H_2O$  1.2,  $MgSO_4 \cdot 7H_2O$  4, taurine 50, glucose 10 and Hepes 10 at a pH of 6.9.

### Measurement of sarcolemmal ionic currents using the whole-cell patch-clamp method

Atrial myocytes were placed in the experimental chamber (RCP-10T, Dagan, Maryland, MI, USA, volume 150  $\mu$ l) and superfused with an external saline solution. In most of the experiments, we used  $Ca^{2+}$ -based Tyrode solution containing (in mmol  $l^{-1}$ ): NaCl 150, CsCl 5.4,  $NaH_2PO_4$  0.4,  $MgSO_4$  1.5,  $CaCl_2$  1.8, glucose 10 and Hepes 10 at pH 7.6 (adjusted with CsOH). In other experiments, we used a  $K^+$ -based Tyrode solution of the same content with the exception of CsCl and CsOH substitution for KCl and KOH, respectively. Tetrodotoxin ( $5 \times 10^{-7}$  mol  $l^{-1}$ ), nifedipine ( $10^{-5}$  mol  $l^{-1}$ ),

E-4031 ( $10^{-6}$  mol l $^{-1}$ ) and BaCl $_2$  ( $10^{-4}$  mol l $^{-1}$ ) were added to external solution to block Na $^+$  channels, L-type Ca $^{2+}$  channels, K $^+$  channels of the fast delayed rectifier K $^+$  current ( $I_{Kr}$ ) and K $^+$  channels of the inward rectifier K $^+$  current ( $I_{K1}$ ), respectively. In experiments with  $I_{K1}$  and  $I_{KACH}$ , BaCl $_2$  was not added in advance to the K $^+$ -based Tyrode. A constant flow of external solution ( $1.5\text{--}2$  ml min $^{-1}$ ) in the experimental chamber was maintained throughout the experiment. Temperature of the saline solutions was regulated at 18°C using a Peltier device (TC-100, Dagan). Pipette solution 1, which was used in the majority of experiments, contained (in mmol l $^{-1}$ ): CsCl 140, MgCl $_2$  1, CaCl $_2$  9, BAPTA 20, Na $_2$ ATP 5, Na $_2$ GTP 0.03 and Hepes 10, adjusted to pH 7.2 with CsOH at 20°C. Under these conditions, free intracellular Ca $^{2+}$  concentration is buffered close to the diastolic level (105 nmol l $^{-1}$ ; calculated using MaxChelator). Pipette solution 2 was used for recording of the inward rectifiers ( $I_{Kir}$ ) and contained (in mmol l $^{-1}$ ): KCl 140, MgCl $_2$  1, EGTA 5, MgATP 4, Na $_2$ GTP 0.03 and Hepes 10 with pH adjusted to 7.2 with KOH.

The whole-cell voltage clamp recording of ionic currents was performed using an Axopatch 1-D amplifier (Axon Instruments, Foster City, CA, USA) and the pClamp 8.2 software package. Resistance of patch electrodes was 2–4 M $\Omega$  when filled with the pipette solution. Pipette capacitance, whole-cell capacitance and access resistance were routinely compensated. In most experiments, the current was elicited at 15 s intervals from the holding potential of  $-46.5$  mV (the calculated reversal potential of NCX) by 1 s voltage ramp pulses (see Fig. 1A, inset). The current was measured during the hyperpolarizing phase of the ramp. For recording of the  $I_{Kir}$ , the common hyperpolarizing ramp (from +60 to  $-120$  mV) protocol with 10 s intervals was used. The holding potential was  $-80$  mV.

## Drugs

Tetrodotoxin, E-4031, KB-R7943, AF-DX 116 {11-[(2-[(diethylamino)methyl]-1-piperidyl)acetyl]-5,11-dihydro-6H-pyrido[2,3-b][1,4]benzodiazepine-6-on, a selective M $_2$  cholinergic receptor blocker}, 4-DAMP (4-diphenylacetoxy-N-methylpiperidine methiodide, a selective M $_3$  receptor antagonist) and PTX, which irreversibly inhibits G $_i$  signaling protein, were all purchased from Tocris (Bristol, UK). Collagenase, trypsin, nifedipine (a blocker of L-type Ca $^{2+}$  channels) and carbamylcholine chloride (a muscarinic agonist) were purchased from Sigma (St Louis, MO, USA).

## Statistics

All data in the text and figures except the original recordings are presented as means  $\pm$  s.e.m. for  $n$  experiments. Effects of CCh on sarcolemmal ionic current relative to the respective basal value of the current were compared using the Wilcoxon test. The density of CCh-induced current in normal conditions and in the presence of muscarinic blockers, PTX, KB-R7943 and other agents was compared using the Mann–Whitney test.  $P < 0.05$  was adopted as the level of statistical significance.

## Acknowledgements

The authors thank Anita Kervinen for skillful technical assistance.

## Competing interests

The authors declare no competing financial interests.

## Author contributions

M.V. and D.A. designed the research and experimental design. All authors performed experiments and participated in writing and editing of the paper.

## Funding

This work was supported by the Academy of Finland [project No. 14795] to M.V. and the Russian Foundation for Basic Research [grant numbers 12-04-31737 and 14-04-01564] to D.A.

## References

- Abramochkin, D. V., Kuzmin, V. S., Sukhova, G. S. and Rosenshtraukh, L. V. (2010). Cholinergic modulation of activation sequence in the atrial myocardium of non-mammalian vertebrates. *Comp. Biochem. Physiol.* **155A**, 231–236.
- Abramochkin, D. V., Tapilina, S. V., Sukhova, G. S., Nikolsky, E. E. and Nurullin, L. F. (2012). Functional M3 cholinergic receptors are present in pacemaker and working myocardium of murine heart. *Pflügers Arch.* **463**, 523–529.
- Boyett, M. R., Kodama, I., Honjo, H., Arai, A., Suzuki, R. and Toyama, J. (1995). Ionic basis of the chronotropic effect of acetylcholine on the rabbit sinoatrial node. *Cardiovasc. Res.* **29**, 867–878.
- Brodde, O. E. and Michel, M. C. (1999). Adrenergic and muscarinic receptors in the human heart. *Pharmacol. Rev.* **51**, 651–690.
- Dhein, S., van Koppen, C. J. and Brodde, O. E. (2001). Muscarinic receptors in the mammalian heart. *Pharmacol. Res.* **44**, 161–182.
- Doods, H. N., Mathy, M. J., Davidesko, D., van Charldorp, K. J., de Jonge, A. and van Zwieten, P. A. (1987). Selectivity of muscarinic antagonists in radioligand and *in vivo* experiments for the putative M1, M2 and M3 receptors. *J. Pharmacol. Exp. Ther.* **242**, 257–262.
- Giachetti, A., Micheletti, R. and Montagna, E. (1986). Cardiosensitive profile of AF-DX 116, a muscarinic M2 receptor antagonist. *Life Sci.* **38**, 1663–1672.
- Hartzell, H. C. (1988). Regulation of cardiac ion channels by catecholamines, acetylcholine and second messenger systems. *Prog. Biophys. Mol. Biol.* **52**, 165–247.
- Hassinen, M., Paajanen, V. and Vornanen, M. (2008). A novel inwardly rectifying K $^+$  channel, Kir2.5, is upregulated under chronic cold stress in fish cardiac myocytes. *J. Exp. Biol.* **211**, 2162–2171.
- Hellgren, I., Mustafa, A., Riaz, M., Suliman, I., Sylvén, C. and Adem, A. (2000). Muscarinic M $_3$  receptor subtype gene expression in the human heart. *Cell. Mol. Life Sci.* **57**, 175–180.
- Hibino, H., Inanobe, A., Furutani, K., Murakami, S., Findlay, I. and Kurachi, Y. (2010). Inwardly rectifying potassium channels: their structure, function, and physiological roles. *Physiol. Rev.* **90**, 291–366.
- Jailon, O., Aury, J.-M., Brunet, F., Petit, J.-L., Stange-Thomann, N., Mauceli, E., Bouneau, L., Fischer, C., Ozouf-Costaz, C., Bernot, A. et al. (2004). Genome duplication in the teleost fish *Tetraodon nigroviridis* reveals the early vertebrate proto-karyotype. *Nature* **431**, 946–957.
- Kakehata, S., Nakagawa, T., Takasaka, T. and Akaike, N. (1993). Cellular mechanism of acetylcholine-induced response in dissociated outer hair cells of guinea-pig cochlea. *J. Physiol.* **463**, 227–244.
- Kitazawa, T., Asakawa, K., Nakamura, T., Teraoka, H., Unno, T., Komori, S., Yamada, M. and Wess, J. (2009). M3 muscarinic receptors mediate positive inotropic responses in mouse atria: a study with muscarinic receptor knockout mice. *J. Pharmacol. Exp. Ther.* **330**, 487–493.
- Langheinrich, U., Vacun, G. and Wagner, T. (2003). Zebrafish embryos express an orthologue of HERG and are sensitive toward a range of QT-prolonging drugs inducing severe arrhythmia. *Toxicol. Appl. Pharmacol.* **193**, 370–382.
- Levy, M. N. (1971). Sympathetic-parasympathetic interactions in the heart. *Circ. Res.* **29**, 437–445.
- Milan, D. J., Peterson, T. A., Ruskin, J. N., Peterson, R. T. and MacRae, C. A. (2003). Drugs that induce repolarization abnormalities cause bradycardia in zebrafish. *Circulation* **107**, 1355–1358.
- Navarro-Polanco, R. A., Aréchiga-Figueroa, I. A., Salazar-Fajardo, P. D., Benavides-Haro, D. E., Rodríguez-Eliás, J. C., Sachse, F. B., Tristani-Firouzi, M., Sánchez-Chapula, J. A. and Moreno-Galindo, E. G. (2013). Voltage sensitivity of M2 muscarinic receptors underlies the delayed rectifier-like activation of ACh-gated K $^+$  current ( $I_{KACH}$ ) by choline in feline atrial myocytes. *J. Physiol.* **591**, 4273–4286.
- Pönicke, K., Heinroth-Hoffmann, I. and Brodde, O.-E. (2003). Demonstration of functional M $_3$ -muscarinic receptors in ventricular cardiomyocytes of adult rats. *Br. J. Pharmacol.* **138**, 156–160.
- Sanders, L., Rakovic, S., Lowe, M., Mattick, P. A. and Terrar, D. A. (2006). Fundamental importance of Na $^+$ -Ca $^{2+}$  exchange for the pacemaking mechanism in guinea-pig sino-atrial node. *J. Physiol.* **571**, 639–649.
- Vornanen, M. (1997). Sarcolemmal Ca influx through L-type Ca channels in ventricular myocytes of a teleost fish. *Am. J. Physiol.* **272**, R1432–R1440.
- Vornanen, M. and Tuomennoro, J. (1999). Effects of acute anoxia on heart function in crucian carp: importance of cholinergic and purinergic control. *Am. J. Physiol.* **277**, R465–R475.
- Wang, H., Shi, H., Lu, Y., Yang, B. and Wang, Z. (1999). Pilocarpine modulates the cellular electrical properties of mammalian hearts by activating a cardiac M3 receptor and a K $^+$  current. *Br. J. Pharmacol.* **126**, 1725–1734.
- Wang, H., Lu, Y. and Wang, Z. (2007). Function of cardiac M $_3$  receptors. *Auton. Autacoid Pharmacol.* **27**, 1–11.
- Xu, Y., Tuteja, D., Zhang, Z., Xu, D., Zhang, Y., Rodriguez, J., Nie, L., Tuxson, H. R., Young, J. N., Glatter, K. A. et al. (2003). Molecular identification and functional roles of a Ca $^{2+}$ -activated K $^+$  channel in human and mouse hearts. *J. Biol. Chem.* **278**, 49085–49094.
